# Supplementary material for: Long-Term Effects of Internet-Based Cognitive Behavioral Therapy on Depression Prevention Among University Students: Randomized Controlled Factorial Trial
Source: PubMed Central journal article supplement (PMC11445681; doi:10.2196/56691), 2024-09-24
Supplement: mental-v11-e56691-s001.pdf [file mental-v11-e56691-s001.pdf]

|     | PE | SM | CR | BA | AT | PS |
|-----|----|----|----|----|----|----|
| C1  | 1  | 1  | 1  | 1  | 1  | 1  |
| C2  | 1  | 1  | 1  | 1  | 1  | 1  |
| C3  | 1  | 1  | 1  | 1  | 1  | 0  |
| C4  | 1  | 1  | 1  | 1  | 1  | 0  |
| C5  | 1  | 1  | 1  | 1  | 0  | 1  |
| C6  | 1  | 1  | 1  | 1  | 0  | 1  |
| C7  | 1  | 1  | 1  | 1  | 0  | 0  |
| C8  | 1  | 1  | 1  | 1  | 0  | 0  |
| C9  | 1  | 1  | 1  | 0  | 1  | 1  |
| C10 | 1  | 1  | 1  | 0  | 1  | 1  |
| C11 | 1  | 1  | 1  | 0  | 1  | 0  |
| C12 | 1  | 1  | 1  | 0  | 1  | 0  |
| C13 | 1  | 1  | 1  | 0  | 0  | 1  |
| C14 | 1  | 1  | 1  | 0  | 0  | 1  |
| C15 | 1  | 1  | 1  | 0  | 0  | 0  |
| C16 | 1  | 1  | 1  | 0  | 0  | 0  |
| C17 | 1  | 1  | 0  | 1  | 1  | 1  |
| C18 | 1  | 1  | 0  | 1  | 1  | 1  |
| C19 | 1  | 1  | 0  | 1  | 1  | 0  |
| C20 | 1  | 1  | 0  | 1  | 1  | 0  |
| C21 | 1  | 1  | 0  | 1  | 0  | 1  |
| C22 | 1  | 1  | 0  | 1  | 0  | 1  |
| C23 | 1  | 1  | 0  | 1  | 0  | 0  |
| C24 | 1  | 1  | 0  | 1  | 0  | 0  |
| C25 | 1  | 1  | 0  | 0  | 1  | 1  |
| C26 | 1  | 1  | 0  | 0  | 1  | 1  |
| C27 | 1  | 1  | 0  | 0  | 1  | 0  |
| C28 | 1  | 1  | 0  | 0  | 1  | 0  |
| C29 | 1  | 1  | 0  | 0  | 0  | 1  |
| C30 | 1  | 1  | 0  | 0  | 0  | 1  |
| C31 | 1  | 1  | 0  | 0  | 0  | 0  |
| C32 | 1  | 1  | 0  | 0  | 0  | 0  |
| C33 | 1  | 0  | 1  | 1  | 1  | 1  |
| C34 | 1  | 0  | 1  | 1  | 1  | 1  |
| C35 | 1  | 0  | 1  | 1  | 1  | 0  |
| C36 | 1  | 0  | 1  | 1  | 1  | 0  |
| C37 | 1  | 0  | 1  | 1  | 0  | 1  |
| C38 | 1  | 0  | 1  | 1  | 0  | 1  |
| C39 | 1  | 0  | 1  | 1  | 0  | 0  |
| C40 | 1  | 0  | 1  | 1  | 0  | 0  |
| C41 | 1  | 0  | 1  | 0  | 1  | 1  |
| C42 | 1  | 0  | 1  | 0  | 1  | 1  |
| C43 | 1  | 0  | 1  | 0  | 1  | 0  |
| C44 | 1  | 0  | 1  | 0  | 1  | 0  |
| C45 | 1  | 0  | 1  | 0  | 0  | 1  |
| C46 | 1  | 0  | 1  | 0  | 0  | 1  |
| C47 | 1  | 0  | 1  | 0  | 0  | 0  |
| C48 | 1  | 0  | 1  | 0  | 0  | 0  |
| C49 | 1  | 0  | 0  | 1  | 1  | 1  |
| C50 | 1  | 0  | 0  | 1  | 1  | 1  |
| C51 | 1  | 0  | 0  | 1  | 1  | 0  |
| C52 | 1  | 0  | 0  | 1  | 1  | 0  |
| C53 | 1  | 0  | 0  | 1  | 0  | 1  |
| C54 | 1  | 0  | 0  | 1  | 0  | 1  |
| C55 | 1  | 0  | 0  | 1  | 0  | 0  |
| C56 | 1  | 0  | 0  | 1  | 0  | 0  |
| C57 | 1  | 0  | 0  | 0  | 1  | 1  |
| C58 |    | 0  | 0  | 0  | 1  | 1  |
| C59 | 1  | 0  | 0  | 0  | 1  | 0  |
| C60 | 1  | 0  | 0  | 0  | 1  | 0  |
| C61 | 1  | 0  | 0  | 0  | 0  | 1  |
| C62 | 1  | 0  | 0  | 0  | 0  | 1  |
| C63 | 1  | 0  | 0  | 0  | 0  | 0  |
| C64 | 1  | 0  | 0  | 0  | 0  | 0  |

|    | Order |    |    |    |    |    | n  |
|----|-------|----|----|----|----|----|----|
| PE | AT    | PS | SM | CR | BA |    | 27 |
| PE |       |    | SM | BA | CR | AT | 25 |
| PE |       |    | SM | CR | BA | AT | 26 |
| PE | AT    |    | SM | BA | CR |    | 26 |
| PE |       | PS | SM | CR | BA |    | 25 |
| PE |       |    | SM | BA | CR |    | 25 |
| PE |       |    | SM | CR | BA |    | 26 |
| PE |       |    | SM | BA | CR |    | 25 |
| PE |       |    | SM | CR |    | AT | 26 |
| PE | AT    | PS | SM | CR |    |    | 23 |
| PE |       |    | SM | CR |    | AT | 25 |
| PE | AT    |    | SM | CR |    |    | 24 |
| PE |       |    | SM | CR |    |    | 24 |
| PE |       | PS | SM | CR |    |    | 25 |
| PE |       |    | SM | CR |    |    | 25 |
| PE |       |    | SM | CR |    |    | 26 |
| PE |       |    | SM |    | BA | AT | 26 |
| PE | AT    | PS | SM |    | BA |    | 25 |
| PE |       |    | SM |    | BA | AT | 25 |
| PE | AT    |    | SM |    | BA |    | 26 |
| PE |       |    | SM |    | BA |    | 23 |
| PE |       | PS | SM |    | BA |    | 26 |
| PE |       |    | SM |    | BA |    | 24 |
| PE |       |    | SM |    | BA |    | 26 |
| PE |       |    | SM |    |    | AT | 24 |
| PE | AT    | PS | SM |    |    |    | 26 |
| PE |       |    | SM |    |    | AT | 27 |
| PE | AT    |    | SM |    |    |    | 25 |
| PE |       |    | SM |    |    |    | 25 |
| PE |       | PS | SM |    |    |    | 26 |
| PE |       |    | SM |    |    |    | 23 |
| PE |       |    | SM |    |    |    | 28 |
| PE |       |    |    | CR | BA | AT | 25 |
| PE | AT    | PS |    | BA | CR |    | 25 |
| PE | AT    |    |    | CR | BA |    | 27 |
| PE |       |    |    | BA | CR | AT | 24 |
| PE |       |    |    | CR | BA |    | 27 |
| PE |       | PS |    | BA | CR |    | 25 |
| PE |       |    |    | CR | BA |    | 26 |
| PE |       |    |    | BA | CR |    | 24 |
| PE |       |    |    | CR |    | AT | 26 |
| PE | AT    | PS |    | CR |    |    | 26 |
| PE |       |    |    | CR |    | AT | 26 |
| PE | AT    |    |    | CR |    |    | 23 |
| PE |       |    |    | CR |    |    | 29 |
| PE |       | PS |    | CR |    |    | 26 |
| PE |       |    |    | CR |    |    | 26 |
| PE |       |    |    | CR |    |    | 23 |
| PE |       |    |    |    | BA | AT | 26 |
| PE | AT    | PS |    |    | BA |    | 24 |
| PE |       |    |    |    | BA | AT | 29 |
| PE | AT    |    |    |    | BA |    | 24 |
| PE |       |    |    |    | BA |    | 26 |
| PE |       |    |    |    | BA |    | 25 |
| PE |       |    |    |    |    | AT | 26 |
| PE | AT    | PS |    |    |    |    | 23 |
| PE |       |    |    |    |    | AT | 26 |
| PE | AT    |    |    |    |    |    | 28 |
| PE |       |    |    |    |    |    | 26 |
| PE |       | PS |    |    |    |    | 24 |
| PE |       |    |    |    |    |    | 24 |
| PE |       |    |    |    |    |    | 26 |
| PE |       |    |    |    |    |    | 26 |
| PE |       |    |    |    |    |    | 24 |
| PE |       |    |    |    |    |    | 24 |
| PE |       |    |    |    |    |    | 26 |
| PE |       |    |    |    |    |    | 26 |
| PE |       |    |    |    |    |    | 24 |
| PE |       |    |    |    |    |    | 24 |
| PE |       |    |    |    |    |    | 26 |
| PE |       |    |    |    |    |    | 26 |
| PE |       |    |    |    |    |    | 24 |
| PE |       |    |    |    |    |    | 24 |
| PE |       |    |    |    |    |    | 26 |
| PE |       |    |    |    |    |    | 26 |
| PE |       |    |    |    |    |    | 24 |
| PE |       |    |    |    |    |    | 24 |
| PE |       |    |    |    |    |    | 26 |
| PE |       |    |    |    |    |    | 26 |
| PE |       |    |    |    |    |    | 24 |
| PE |       |    |    |    |    |    | 24 |
| PE |       |    |    |    |    |    | 26 |
| PE |       |    |    |    |    |    | 26 |
| PE |       |    |    |    |    |    | 24 |
| PE |       |    |    |    |    |    | 24 |
| PE |       |    |    |    |    |    | 26 |
| PE |       |    |    |    |    |    | 26 |
| PE |       |    |    |    |    |    | 24 |
| PE |       |    |    |    |    |    | 24 |
| PE |       |    |    |    |    |    | 26 |
| PE |       |    |    |    |    |    | 26 |
| PE |       |    |    |    |    |    | 24 |
| PE |       |    |    |    |    |    | 24 |
| PE |       |    |    |    |    |    | 26 |
| PE |       |    |    |    |    |    | 26 |
| PE |       |    |    |    |    |    | 24 |
| PE |       |    |    |    |    |    | 24 |
| PE |       |    |    |    |    |    | 26 |
| PE |       |    |    |    |    |    | 26 |
| PE |       |    |    |    |    |    | 24 |
| PE |       |    |    |    |    |    | 24 |
| PE |       |    |    |    |    |    | 26 |
| PE |       |    |    |    |    |    | 26 |
| PE |       |    |    |    |    |    | 24 |
| PE |       |    |    |    |    |    | 24 |
| PE |       |    |    |    |    |    | 26 |
| PE |       |    |    |    |    |    | 26 |
| PE |       |    |    |    |    |    | 24 |
| PE |       |    |    |    |    |    | 24 |
| PE |       |    |    |    |    |    | 26 |
| PE |       |    |    |    |    |    | 26 |
| PE |       |    |    |    |    |    | 24 |
| PE |       |    |    |    |    |    | 24 |
| PE |       |    |    |    |    |    | 26 |
| PE |       |    |    |    |    |    | 26 |
| PE |       |    |    |    |    |    | 24 |
| PE |       |    |    |    |    |    | 24 |
| PE |       |    |    |    |    |    | 26 |
| PE |       |    |    |    |    |    | 26 |
| PE |       |    |    |    |    |    | 24 |
| PE |       |    |    |    |    |    | 24 |
| PE |       |    |    |    |    |    | 26 |
| PE |       |    |    |    |    |    | 26 |
| PE |       |    |    |    |    |    | 24 |
| PE |       |    |    |    |    |    | 24 |
| PE |       |    |    |    |    |    | 26 |
| PE |       |    |    |    |    |    | 26 |
| PE |       |    |    |    |    |    | 24 |
| PE |       |    |    |    |    |    | 24 |
| PE |       |    |    |    |    |    | 26 |
| PE |       |    |    |    |    |    | 26 |
| PE |       |    |    |    |    |    | 24 |
| PE |       |    |    |    |    |    | 24 |
| PE |       |    |    |    |    |    | 26 |
| PE |       |    |    |    |    |    | 26 |
| PE |       |    |    |    |    |    | 24 |
| PE |       |    |    |    |    |    | 24 |
| PE |       |    |    |    |    |    | 26 |
| PE |       |    |    |    |    |    | 26 |
| PE |       |    |    |    |    |    | 24 |
| PE |       |    |    |    |    |    | 24 |
| PE |       |    |    |    |    |    | 26 |
| PE |       |    |    |    |    |    | 26 |
| PE |       |    |    |    |    |    | 24 |
| PE |       |    |    |    |    |    | 24 |
| PE |       |    |    |    |    |    | 26 |
| PE |       |    |    |    |    |    | 26 |
| PE |       |    |    |    |    |    | 24 |
| PE |       |    |    |    |    |    | 24 |
| PE |       |    |    |    |    |    | 26 |
| PE |       |    |    |    |    |    | 26 |
| PE |       |    |    |    |    |    | 24 |
| PE |       |    |    |    |    |    | 24 |
| PE |       |    |    |    |    |    | 26 |
| PE |       |    |    |    |    |    | 26 |
| PE |       |    |    |    |    |    | 24 |
| PE |       |    |    |    |    |    | 24 |
| PE |       |    |    |    |    |    | 26 |
| PE |       |    |    |    |    |    | 26 |
| PE |       |    |    |    |    |    | 24 |
| PE |       |    |    |    |    |    | 24 |
| PE |       |    |    |    |    |    | 26 |
| PE |       |    |    |    |    |    | 26 |
| PE |       |    |    |    |    |    | 24 |
| PE |       |    |    |    |    |    | 24 |
| PE |       |    |    |    |    |    | 26 |
| PE |       |    |    |    |    |    | 26 |
| PE |       |    |    |    |    |    | 24 |
| PE |       |    |    |    |    |    | 24 |
| PE |       |    |    |    |    |    | 26 |
| PE |       |    |    |    |    |    | 26 |
| PE |       |    |    |    |    |    | 24 |
| PE |       |    |    |    |    |    | 24 |
| PE |       |    |    |    |    |    | 26 |
| PE |       |    |    |    |    |    | 26 |
| PE |       |    |    |    |    |    | 24 |
| PE |       |    |    |    |    |    | 24 |
| PE |       |    |    |    |    |    | 26 |
| PE |       |    |    |    |    |    | 26 |
| PE |       |    |    |    |    |    | 24 |
| PE |       |    |    |    |    |    | 24 |
| PE |       |    |    |    |    |    | 26 |
| PE |       |    |    |    |    |    | 26 |
| PE |       |    |    |    |    |    | 24 |
| PE |       |    |    |    |    |    | 24 |
| PE |       |    |    |    |    |    | 26 |
| PE |       |    |    |    |    |    | 26 |
| PE |       |    |    |    |    |    | 24 |
| PE |       |    |    |    |    |    | 24 |
| PE |       |    |    |    |    |    | 26 |
| PE |       |    |    |    |    |    | 26 |
| PE |       |    |    |    |    |    | 24 |
| PE |       |    |    |    |    |    | 24 |
| PE |       |    |    |    |    |    | 26 |
| PE |       |    |    |    |    |    | 26 |
| PE |       |    |    |    |    |    | 24 |
| PE |       |    |    |    |    |    | 24 |
| PE |       |    |    |    |    |    | 26 |
| PE |       |    |    |    |    |    | 26 |
| PE |       |    |    |    |    |    | 24 |
| PE |       |    |    |    |    |    | 24 |
| PE |       |    |    |    |    |    | 26 |
| PE |       |    |    |    |    |    | 26 |
| PE |       |    |    |    |    |    | 24 |
| PE |       |    |    |    |    |    | 24 |
| PE |       |    |    |    |    |    | 26 |
| PE |       |    |    |    |    |    | 26 |
| PE |       |    |    |    |    |    | 24 |
| PE |       |    |    |    |    |    | 24 |
| PE |       |    |    |    |    |    | 26 |
| PE |       |    |    |    |    |    | 26 |
