# Supplementary material for: Long-Term Effects of Internet-Based Cognitive Behavioral Therapy on Depression Prevention Among University Students: Randomized Controlled Factorial Trial
Source: PubMed Central journal article supplement (PMC11445681; doi:10.2196/56691), 2024-09-24
Supplement: mental-v11-e56691-s002.pdf [file mental-v11-e56691-s002.pdf]

Baseline characteristics of total participants for 1-year analysis (N=1626) and by each component

|                                                                              | Total       | SM <sup>a</sup> |             | BA <sup>b</sup> |             | CR <sup>c</sup> |             | AT <sup>d</sup> |             | PS <sup>e</sup> |             |
|------------------------------------------------------------------------------|-------------|-----------------|-------------|-----------------|-------------|-----------------|-------------|-----------------|-------------|-----------------|-------------|
|                                                                              |             | Presence        | Absence     | Presence        | Absence     | Presence        | Absence     | Presence        | Absence     | Presence        | Absence     |
| N                                                                            | 1626        | 808             | 818         | 817             | 809         | 811             | 815         | 814             | 812         | 811             | 815         |
| <b>Demographic</b>                                                           |             |                 |             |                 |             |                 |             |                 |             |                 |             |
| Age (years), mean (SD)                                                       | 21.50(2.99) | 21.56(3.01)     | 21.48(2.96) | 21.54(2.86)     | 21.50(3.11) | 21.56(3.09)     | 21.48(2.87) | 21.52(3.12)     | 21.52(2.85) | 21.53(3.08)     | 21.51(2.88) |
| Sex (female), n (%)                                                          | 933(57.38)  | 463(57.3)       | 470(57.5)   | 464(56.8)       | 469(58.0)   | 462(57.0)       | 471(57.8)   | 470(57.7)       | 463(57.0)   | 476(58.7)       | 457(56.1)   |
| Undergraduate, n (%)                                                         | 1250(76.88) | 613(75.9)       | 637(77.9)   | 626(76.6)       | 624(77.1)   | 630(77.7)       | 620(76.1)   | 627(77.0)       | 623(76.7)   | 619(76.3)       | 631(77.4)   |
| Married, n (%)                                                               | 33(2.03)    | 16(2.0)         | 17(2.1)     | 11(1.3)         | 22(2.7)     | 15(1.8)         | 18(2.2)     | 17(2.1)         | 16(2.0)     | 14(1.7)         | 19(2.3)     |
| Living alone (apart from family), n (%)                                      | 1002(61.62) | 510(63.1)       | 492(60.1)   | 514(62.9)       | 488(60.3)   | 500(61.7)       | 502(61.6)   | 505(62.0)       | 497(61.2)   | 504(62.1)       | 498(61.1)   |
| Part-time employment, n (%)                                                  | 1261(77.55) | 615(76.1)       | 646(79.0)   | 646(79.1)       | 615(76.0)   | 624(76.9)       | 637(78.2)   | 623(76.5)       | 638(78.6)   | 635(78.3)       | 626(76.8)   |
| Smoking experience, n (%)                                                    | 94(5.78)    | 49(6.1)         | 45(5.5)     | 44(5.4)         | 50(6.2)     | 46(5.7)         | 48(5.9)     | 40(4.9)         | 54(6.7)     | 51(6.3)         | 43(5.3)     |
| Drinking alcohol regularly, n (%)                                            | 665(40.90)  | 329(40.7)       | 336(41.1)   | 340(41.6)       | 325(40.2)   | 334(41.2)       | 331(40.6)   | 337(41.4)       | 328(40.4)   | 328(40.4)       | 337(41.3)   |
| Exercise opportunity, n (%)                                                  | 1014(62.36) | 503(62.3)       | 511(62.5)   | 513(62.8)       | 501(61.9)   | 503(62.0)       | 511(62.7)   | 499(61.3)       | 515(63.4)   | 518(63.9)       | 496(60.9)   |
| History of psychiatric / psychological treatment, n (%)                      | 184(11.32)  | 102(12.6)       | 82(10.0)    | 92(11.3)        | 92(11.4)    | 85(10.5)        | 99(12.1)    | 88(10.8)        | 96(11.8)    | 84(10.4)        | 100(12.3)   |
| History of major depressive episode in past year (CIDI <sup>f</sup> ), n (%) | 151(9.29)   | 84(10.4)        | 67(8.2)     | 74(9.1)         | 77(9.5)     | 79(9.7)         | 72(8.8)     | 68(8.4)         | 83(10.2)    | 76(9.4)         | 75(9.2)     |

Baseline characteristics of total participants for 1-year analysis (N=1626) and by each component

|                                      | Total       | SM <sup>a</sup> |             | BA <sup>b</sup> |             | CR <sup>c</sup> |             | AT <sup>d</sup> |             | PS <sup>e</sup> |             |
|--------------------------------------|-------------|-----------------|-------------|-----------------|-------------|-----------------|-------------|-----------------|-------------|-----------------|-------------|
|                                      |             | Presence        | Absence     | Presence        | Absence     | Presence        | Absence     | Presence        | Absence     | Presence        | Absence     |
| N                                    | 1626        | 808             | 818         | 817             | 809         | 811             | 815         | 814             | 812         | 811             | 815         |
| Cognitive and behavioral skills      |             |                 |             |                 |             |                 |             |                 |             |                 |             |
| SM Skills                            | 8.03(3.26)  | 7.91(3.34)      | 8.15(3.15)  | 8.00(3.23)      | 8.06(3.28)  | 7.99(3.28)      | 8.07(3.22)  | 8.03(3.29)      | 8.03(3.21)  | 8.02(3.20)      | 8.04(3.30)  |
| BA Skills                            | 10.53(4.33) | 10.58(4.46)     | 10.48(4.18) | 10.45(4.37)     | 10.61(4.27) | 10.66(4.28)     | 10.4(4.36)  | 10.56(4.30)     | 10.5(4.35)  | 10.57(4.25)     | 10.49(4.39) |
| CR Skills                            | 8.71(3.44)  | 8.69(3.47)      | 8.72(3.41)  | 8.79(3.39)      | 8.61(3.49)  | 8.84(3.47)      | 8.57(3.40)  | 8.88(3.42)      | 8.52(3.44)  | 8.61(3.56)      | 8.8(3.31)   |
| AT Skills                            | 9.60(3.55)  | 9.44(3.56)      | 9.75(3.52)  | 9.61(3.44)      | 9.58(3.64)  | 9.60(3.59)      | 9.59(3.50)  | 9.64(3.48)      | 9.56(3.60)  | 9.44(3.59)      | 9.75(3.49)  |
| PS Skills                            | 10.60(3.09) | 10.46(3.13)     | 10.73(3.03) | 10.55(3.04)     | 10.65(3.12) | 10.65(3.07)     | 10.55(3.09) | 10.77(3.09)     | 10.43(3.07) | 10.47(3.18)     | 10.72(2.97) |
| Clinical characteristic, mean (SD)   |             |                 |             |                 |             |                 |             |                 |             |                 |             |
| PHQ-9 <sup>g</sup>                   | 6.38(3.40)  | 6.48(3.47)      | 6.28(3.32)  | 6.43(3.44)      | 6.32(3.35)  | 6.36(3.32)      | 6.39(3.48)  | 6.40(3.45)      | 6.35(3.34)  | 6.36(3.33)      | 6.39(3.47)  |
| GAD-7 <sup>h</sup>                   | 5.47(3.35)  | 5.39(3.19)      | 5.55(3.49)  | 5.73(3.36)      | 5.20(3.30)  | 5.48(3.34)      | 5.46(3.35)  | 5.55(3.40)      | 5.39(3.28)  | 5.53(3.24)      | 5.40(3.44)  |
| Function, mean (SD)                  |             |                 |             |                 |             |                 |             |                 |             |                 |             |
| WHO-HPQ <sup>i</sup><br>Presenteeism | 6.3(1.58)   | 6.28(1.51)      | 6.32(1.64)  | 6.26(1.57)      | 6.34(1.58)  | 6.27(1.60)      | 6.33(1.55)  | 6.32(1.59)      | 6.28(1.56)  | 6.27(1.6)       | 6.32(1.54)  |

<sup>a</sup>SM: self-monitoring.

<sup>b</sup>BA: behavioral activation.

<sup>c</sup>CR: cognitive restructuring.

<sup>d</sup>AT: assertiveness training.

<sup>e</sup>PS: problem-solving.

<sup>f</sup>CIDI: Composite International Diagnostic Interview.

<sup>g</sup>PHQ-9: Patient Health Questionnaire-9.

<sup>h</sup>GAD-7: General Anxiety Disorder-7.

<sup>i</sup>WHO-HPQ: World Health Organization Health and Work Performance Questionnaire.
