# Supplementary material for: Long-Term Effects of Internet-Based Cognitive Behavioral Therapy on Depression Prevention Among University Students: Randomized Controlled Factorial Trial
Source: PubMed Central journal article supplement (PMC11445681; doi:10.2196/56691), 2024-09-24
Supplement: mental-v11-e56691-s003.pdf [file mental-v11-e56691-s003.pdf]

Results of multiple Cox regression analyses of each CBT<sup>a</sup> component and covariates on the occurrence of MDE<sup>b</sup>

|                          | HR <sup>c</sup> | SE <sup>d</sup> | 95%CI |         | <i>P</i> value |
|--------------------------|-----------------|-----------------|-------|---------|----------------|
| SM <sup>e</sup>          | 1.26            | 0.18            | 0.88  | to 1.80 | .21            |
| PHQ-9 <sup>f</sup> Point | 1.18            | 0.03            | 1.11  | to 1.24 | .00            |
| university A             | 1.14            | 0.24            | 0.71  | to 1.84 | .58            |
| university B             | 1.15            | 0.38            | 0.55  | to 2.40 | .71            |
| university C             | 1.07            | 0.31            | 0.59  | to 1.96 | .82            |
| university D             | 0.66            | 0.59            | 0.21  | to 2.08 | .48            |
| age                      | 1.03            | 0.03            | 0.97  | to 1.09 | .30            |
| sex (male vs. female)    | 0.96            | 0.18            | 0.68  | to 1.36 | .82            |

|                       | HR   | SE   | 95%CI |         | <i>P</i> value |
|-----------------------|------|------|-------|---------|----------------|
| BA <sup>g</sup>       | 1.09 | 0.18 | 0.77  | to 1.54 | .63            |
| PHQ-9 Point           | 1.18 | 0.03 | 1.12  | to 1.24 | .00            |
| university A          | 1.15 | 0.24 | 0.71  | to 1.85 | .57            |
| university B          | 1.14 | 0.39 | 0.53  | to 2.45 | .74            |
| university C          | 1.09 | 0.31 | 0.60  | to 1.98 | .79            |
| university D          | 0.65 | 0.52 | 0.24  | to 1.79 | .41            |
| age                   | 1.03 | 0.03 | 0.97  | to 1.09 | .31            |
| sex (male vs. female) | 0.95 | 0.18 | 0.67  | to 1.35 | .78            |

|                       | HR   | SE   | 95%CI |         | <i>P</i> value |
|-----------------------|------|------|-------|---------|----------------|
| CR <sup>h</sup>       | 1.18 | 0.18 | 0.83  | to 1.68 | .37            |
| PHQ-9 Point           | 1.18 | 0.03 | 1.12  | to 1.25 | .00            |
| university A          | 1.15 | 0.24 | 0.72  | to 1.84 | .57            |
| university B          | 1.13 | 0.38 | 0.54  | to 2.36 | .75            |
| university C          | 1.09 | 0.31 | 0.60  | to 2.00 | .78            |
| university D          | 0.65 | 0.46 | 0.26  | to 1.60 | .34            |
| age                   | 1.03 | 0.03 | 0.97  | to 1.09 | .34            |
| sex (male vs. female) | 0.96 | 0.18 | 0.67  | to 1.36 | .80            |

|                       | HR   | SE   | 95%CI        | <i>P</i> value |
|-----------------------|------|------|--------------|----------------|
| AT <sup>i</sup>       | 0.85 | 0.18 | 0.60 to 1.20 | .35            |
| PHQ-9 Point           | 1.18 | 0.03 | 1.12 to 1.25 | .00            |
| university A          | 1.14 | 0.24 | 0.72 to 1.82 | .57            |
| university B          | 1.13 | 0.38 | 0.54 to 2.38 | .74            |
| university C          | 1.08 | 0.31 | 0.59 to 1.98 | .80            |
| university D          | 0.65 | 0.48 | 0.26 to 1.66 | .37            |
| age                   | 1.03 | 0.03 | 0.98 to 1.09 | .29            |
| sex (male vs. female) | 0.96 | 0.18 | 0.68 to 1.35 | .80            |

|                       | HR   | SE   | 95%CI        | <i>P</i> value |
|-----------------------|------|------|--------------|----------------|
| PS <sup>j</sup>       | 1.18 | 0.18 | 0.82 to 1.68 | .37            |
| PHQ-9 Point           | 1.18 | 0.03 | 1.12 to 1.25 | .00            |
| university A          | 1.15 | 0.24 | 0.72 to 1.85 | .55            |
| university B          | 1.14 | 0.38 | 0.54 to 2.41 | .74            |
| university C          | 1.09 | 0.31 | 0.59 to 2.00 | .79            |
| university D          | 0.65 | 0.55 | 0.22 to 1.91 | .43            |
| age                   | 1.03 | 0.03 | 0.97 to 1.09 | .36            |
| sex (male vs. female) | 0.95 | 0.18 | 0.67 to 1.34 | .77            |

<sup>a</sup>CBT: cognitive behavioral therapy.

<sup>b</sup>MDE: major depressive episode

<sup>c</sup>HR: hazard ratio.

<sup>d</sup>SE: standard error.

<sup>e</sup>SM: self-monitoring.

<sup>f</sup>PHQ-9: Patient Health Questionnaire-9.

<sup>g</sup>BA: behavioral activation.

<sup>h</sup>CR: cognitive restructuring.

<sup>i</sup>AT: assertiveness training.

<sup>j</sup>PS: problem-solving.
