# Supplementary material for: Long-Term Effects of Internet-Based Cognitive Behavioral Therapy on Depression Prevention Among University Students: Randomized Controlled Factorial Trial
Source: PubMed Central journal article supplement (PMC11445681; doi:10.2196/56691), 2024-09-24
Supplement: mental-v11-e56691-s004.pdf [file mental-v11-e56691-s004.pdf]

Summary of the results of simple cox regression analyses of each CBT<sup>a</sup> component on the occurrence of MDE<sup>b</sup>

| Component       | Cases with MDE, n/N (Completed N) |                | HR <sup>c</sup> for incident MDE |                 |              |                |  |
|-----------------|-----------------------------------|----------------|----------------------------------|-----------------|--------------|----------------|--|
|                 | Presence                          | Absence        | HR                               | SE <sup>d</sup> | 95%CI        | <i>P</i> value |  |
| SM <sup>e</sup> | 75 / 808 (638)                    | 58 / 818 (663) | 1.37                             | 0.18            | 0.96 to 1.95 | .08            |  |
| BA <sup>f</sup> | 69 / 817 (648)                    | 64 / 809 (653) | 1.09                             | 0.17            | 0.78 to 1.52 | .63            |  |
| CR <sup>g</sup> | 72 / 811 (652)                    | 61 / 815 (649) | 1.18                             | 0.17            | 0.84 to 1.67 | .33            |  |
| AT <sup>h</sup> | 62 / 814 (647)                    | 71 / 812 (654) | 0.88                             | 0.18            | 0.62 to 1.24 | .46            |  |
| PS <sup>i</sup> | 71 / 811 (646)                    | 62 / 815 (655) | 1.17                             | 0.18            | 0.82 to 1.66 | .38            |  |

<sup>a</sup>CBT: cognitive behavioral therapy.

<sup>b</sup>MDE: major depressive episode

<sup>c</sup>HR: hazard ratio.

<sup>d</sup>SE: standard error.

<sup>e</sup>SM: self-monitoring.

<sup>f</sup>BA: behavioral activation.

<sup>g</sup>CR: cognitive restructuring.

<sup>h</sup>AT: assertiveness training.

<sup>i</sup>PS: problem-solving.
